# Supplementary material for: Evolution of Mechanisms that Control Mating in Drosophila Males
Source: PubMed Central journal article supplement — Cell Rep. Author manuscript; Available in PMC 2019 Jul 22. (PMC6646047; doi:10.1016/j.celrep.2019.04.104), 2019-05-28
Supplement: NIHMS1530461-supplement-1.pdf [file NIHMS1530461-supplement-1.pdf]

**Cell Reports, Volume 27**

## **Supplemental Information**

### **Evolution of Mechanisms that Control**

#### **Mating in *Drosophila* Males**

**Osama M. Ahmed, Aram Avila-Herrera, Khin May Tun, Paula H. Serpa, Justin Peng, Srinivas Parthasarathy, Jon-Michael Knapp, David L. Stern, Graeme W. Davis, Katherine S. Pollard, and Nirao M. Shah**

**Figure S1, related to Figures 1 and 2**

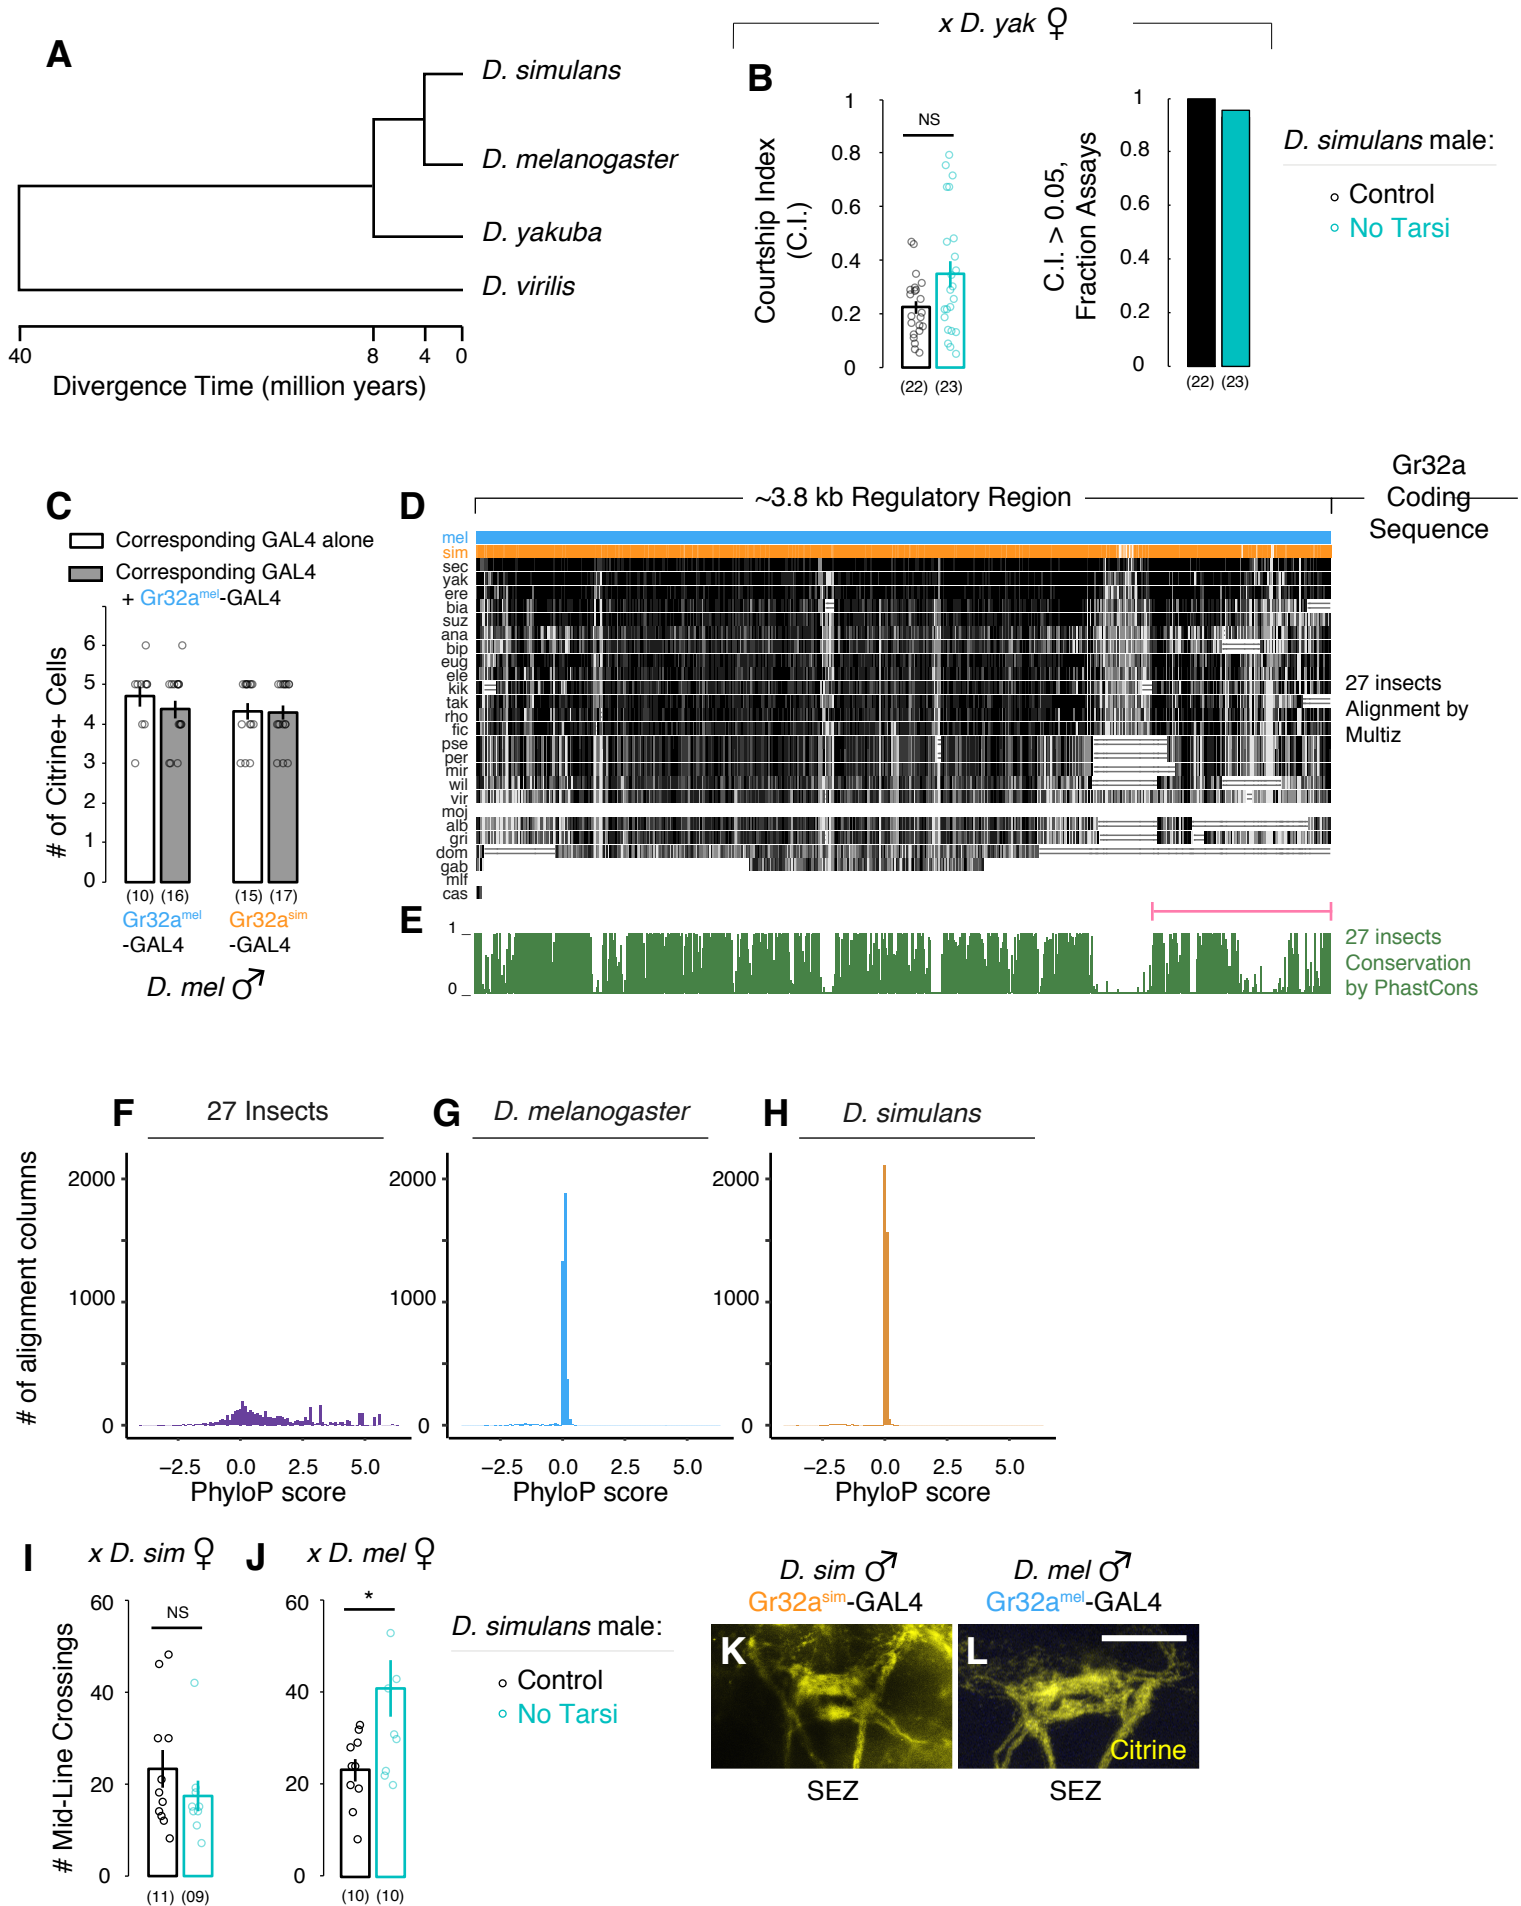

**Figure S1: A regulatory region upstream of *Gr32a* coding sequence is conserved across drosophilids. Related to Figures 1 and 2.**

(A) Evolutionary relationship of the four *Drosophila* species used in this study.

(B) Foreleg tarsi do not inhibit *D. simulans* males from courting *D. yakuba* females.

Mean  $\pm$  SEM; each circle denotes CI of a *D. simulans* male; n = 22 - 23/cohort; \*\*\*p<0.001.

(C) No difference in the number of Citrine<sup>+</sup> cells in T4 and T5 foreleg segments of *D.*

*melanogaster* males observed with either Gr32a<sup>mel</sup>-GAL4 or Gr32a<sup>sim</sup>-GAL4 alone or in

combination. These findings indicate that the upstream regulatory sequence in Gr32a is

functionally conserved between *D. melanogaster* and *D. simulans*; however, it is formally

possible that the similarity in number of Citrine<sup>+</sup> cells in *D. melanogaster* carrying one or both

*GAL4* alleles reflects effects of transvection in the presence of both *GAL4* alleles rather than

functional conservation. Mean  $\pm$  SEM; each circle denotes Citrine<sup>+</sup> cell count for a foreleg

tarsus; n = 10 - 17/genotype.

(D) 27-insect alignment of the ~3.8 kb DNA element that drives *Gr32a* expression in *D.*

*melanogaster* and *D. simulans*. mel, *D. melanogaster* (blue); sim, *D. simulans* (orange); sec, *D.*

*sechellia*; yak, *D. yakuba*; ere, *D. erecta*; bia, *D. biarmipes*; suz, *D. suzukii*; ana, *D. ananassae*;

bip, *D. bipunctinata*; eug, *D. eugracilis*; ele, *D. elegans*; kik, *D. kikkawai*; tak, *D. takahashii*; rho,

*D. rhopaloa*; fic, *D. ficusphila*; pse, *D. pseudoobscura*; per, *D. persimilis*; mir, *D. miranda*; wil,

*D. willistoni*; vir, *D. virilis*; moj, *D. mojavensis*; alb, *D. albomicans*; gri, *D. grimshawi*; dom,

*Musca domestica*; gab, *Anopheles gambiae*; mlf, *Apis mellifera*; cas, *Tribolium castaneum*.

(E) Track showing PhastCons conservation score across the region in (D). Pink bar indicates the

intergenic region directly 5' of the Gr32a start codon and 5'UTR, which contains several blocks

of highly conserved sequence. Higher peaks indicate higher likelihood of bases being in a

strongly conserved element.

(F) Distribution of nucleotide resolution phyloP conservation scores for the region shown in (D). Most bases in the region are evolving at the same or slower rate than 4-fold degenerate (4D) sites in the multiple sequence alignment of 27 insects. Large positive ( $> 2$ ) or negative ( $< -2$ ) scores indicate conservation or acceleration, respectively. Scores near “0” indicate a similar substitution rate to 4D sites.

(G, H) Distribution of phyloP scores for branch-specific evolutionary tests. Most bases in the ~3.8 kb region are likely evolving more slowly or as slowly as expected in *D. melanogaster* (G) and *D. simulans* (H) compared to the other 26 insects in the tree. Scores near “0” indicate a similar rate of DNA evolution in the designated species relative to all other species in the tree.

(I, J) Removing the foreleg tarsi of *D. simulans* males does not diminish locomotor activity during courtship assays. Mean  $\pm$  SEM; each circle denotes # of midline crossings of a *D. simulans* male; n = 9 - 11/cohort; \*p<0.05.

(K, L) Projection pattern of Gr32a neurons in the SEZ is similar between *D. melanogaster* and *D. simulans* males. n = 3 - 4 brains/genotype; scale bar = 50  $\mu$ m.

**Figure S2, related to Figure 3**

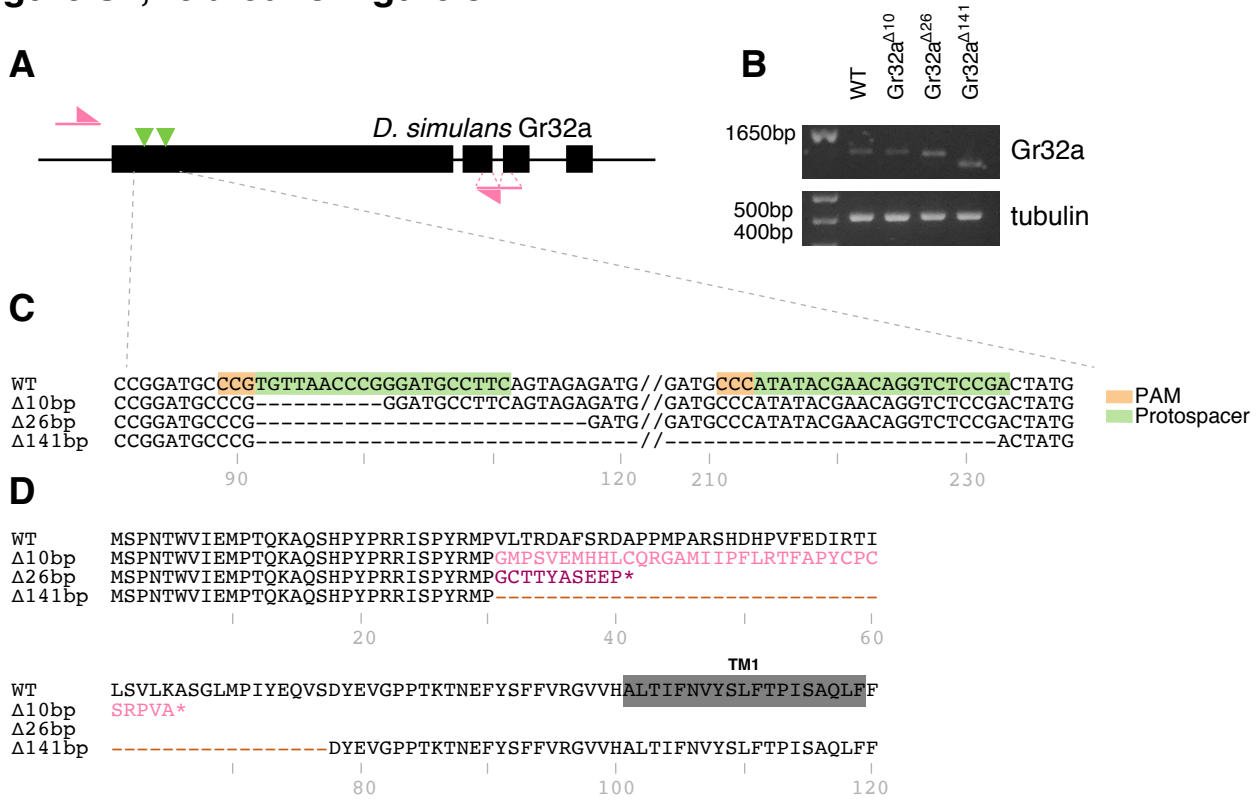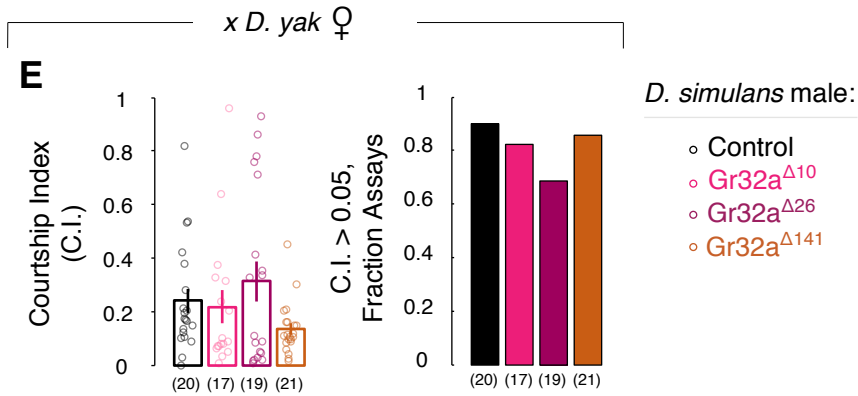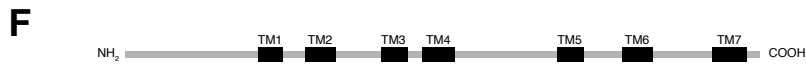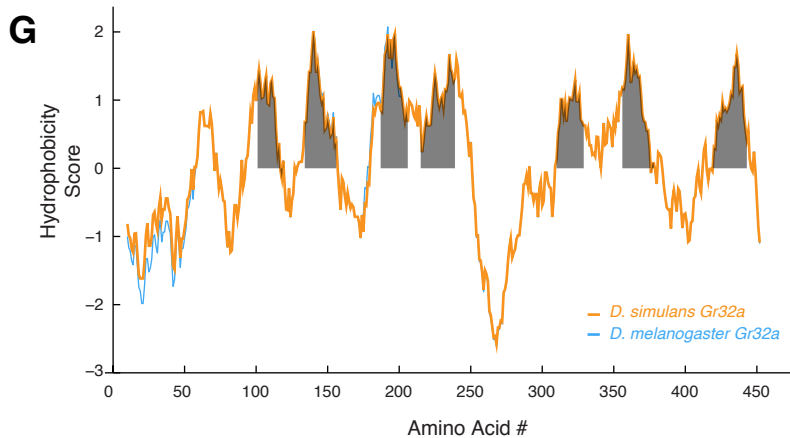

**Figure S2: Generating Gr32a mutant *D. simulans* via CRISPR/Cas9. Related to Figure 3.**

(A) Schematic of *D. simulans* *Gr32a* locus. Pink arrows, PCR primers; green triangles, CRISPR target sites; black rectangles, exons.

(B) RT-PCR products for *Gr32a* and tubulin in WT and *Gr32a* mutant *D. simulans*, using PCR primers shown in (A). DNA ladder shown in first lane.

(C) DNA sequence comparison of WT and mutant *Gr32a* alleles. PAM, Protospacer Adjacent Motif.

(D) Predicted amino acid sequence of WT and mutant *D. simulans* *Gr32a*. The predicted first transmembrane domain (TM1) is highlighted in gray in the WT protein. \*, premature stop codon.

(E) No difference in courtship of *D. yakuba* females by WT and *Gr32a* mutant *D. simulans* males. Mean  $\pm$  SEM; each circle represents CI of a male; n = 17 - 21/genotype.

(F) Predicted location of the seven transmembrane domains (black rectangles) in *Gr32a* based on plot shown in (G). The NH<sub>2</sub> terminal is predicted to be intracellular.

(G) Hydrophobicity plot of *D. simulans* and *D. melanogaster* *Gr32a*. Predicted transmembrane domains are shown by gray shading.

Please see Table S2.

**Figure S3, related to Figure 3**

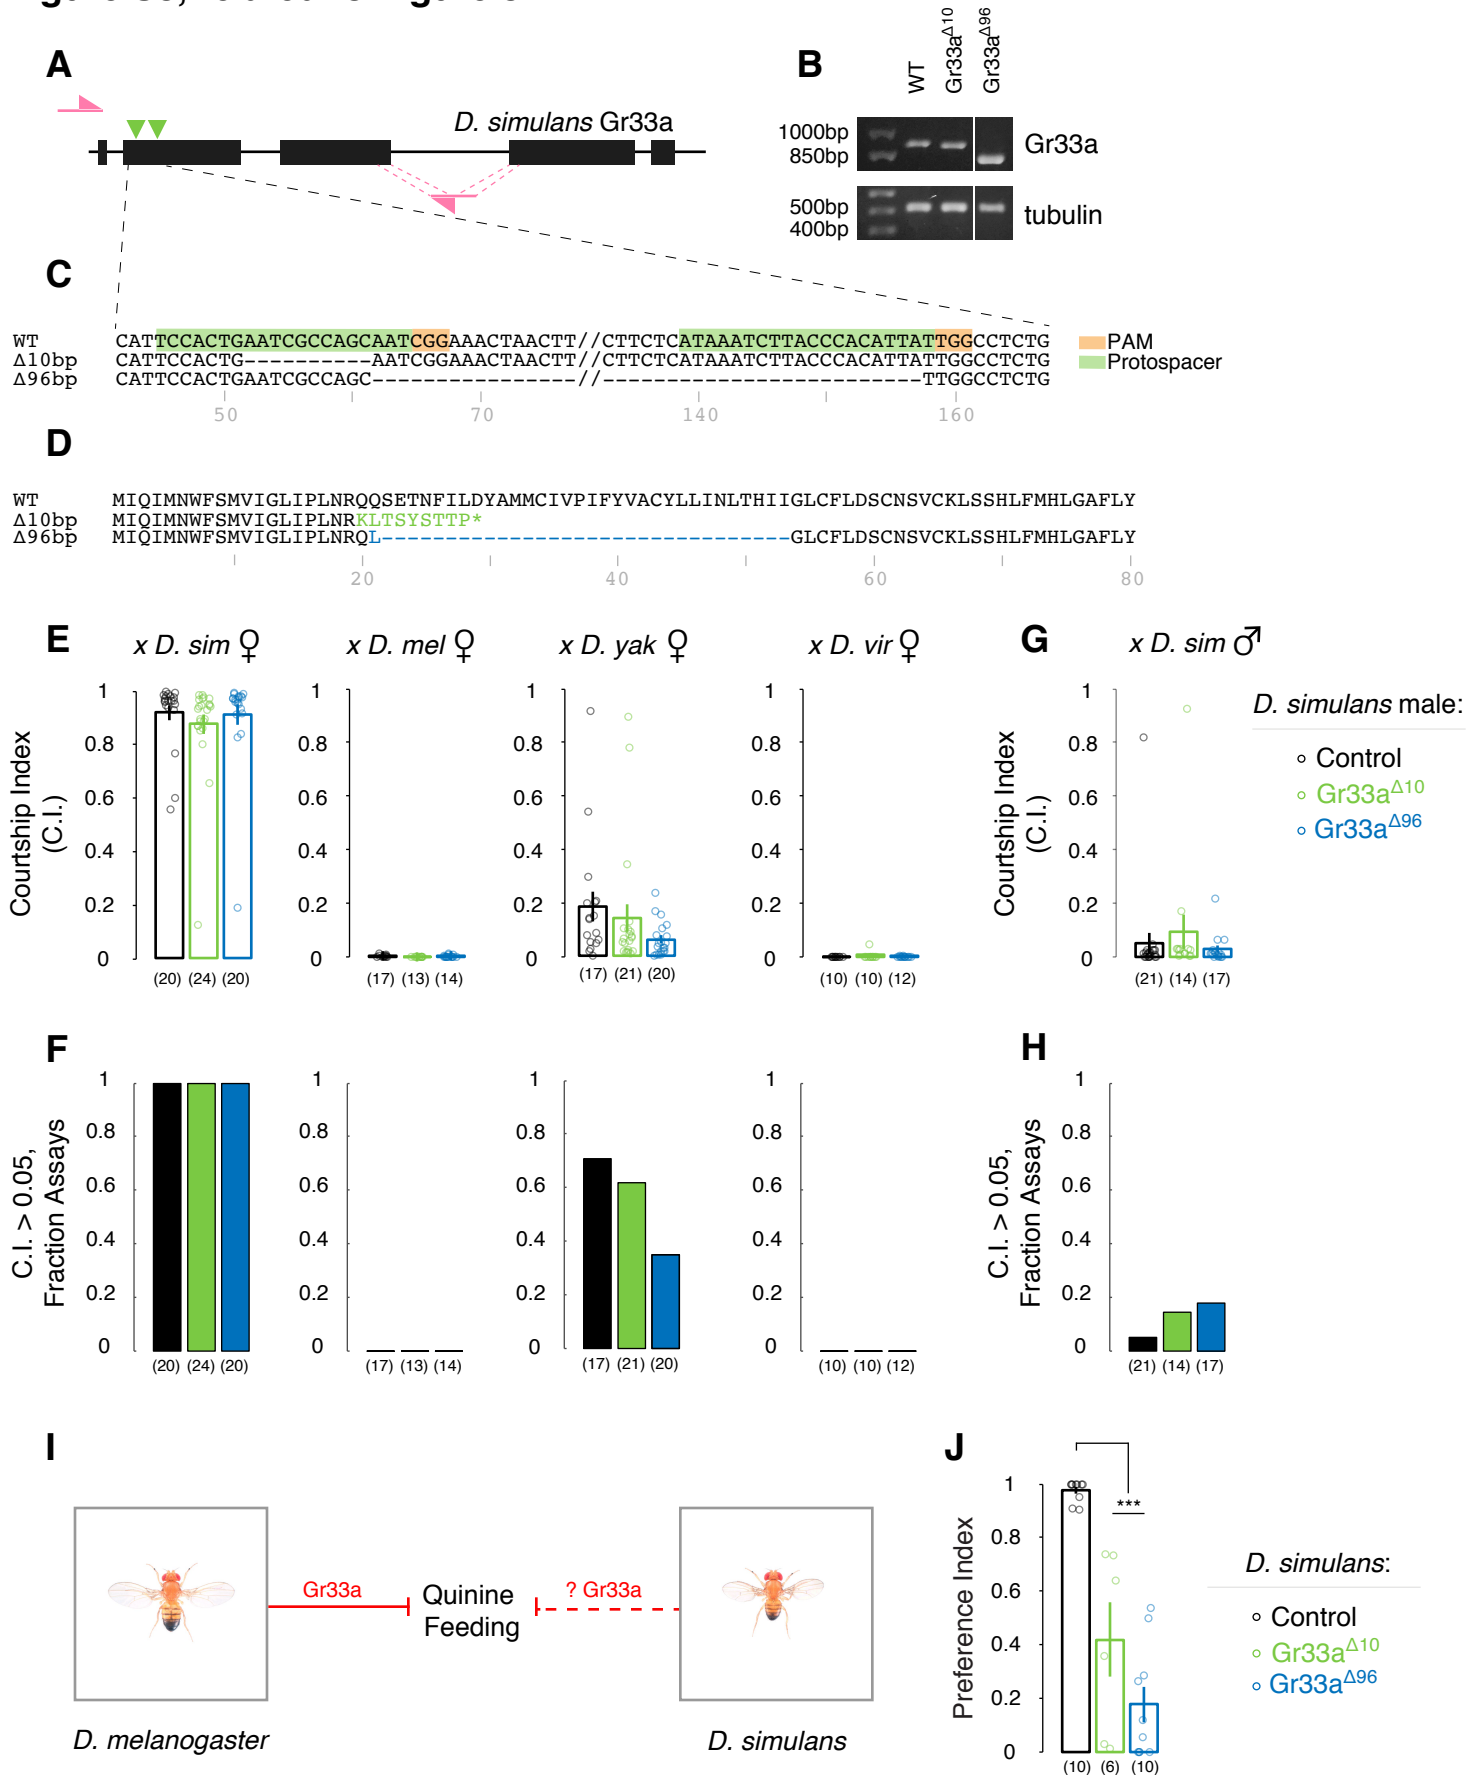

**Figure S3: Gr33a is not required to inhibit interspecies courtship behavior of *D. simulans* males but does inhibit *D. simulans* from feeding on quinine. Related to Figure 3.**

(A) Schematic of *D. simulans* *Gr33a* locus. Pink arrows, PCR primers; green triangles, CRISPR target sites; black rectangles, exons.

(B) RT-PCR products for *Gr33a* and tubulin in WT and *Gr33a* mutant *D. simulans*, using PCR primers shown in (A). Note that products from WT, *Gr33a*<sup>Δ10</sup> and *Gr33a*<sup>Δ96</sup> flies were run on the same gel, and lane between *Gr33a*<sup>Δ10</sup> and *Gr33a*<sup>Δ96</sup> has been cropped out for clarity of comparison. DNA ladder shown in first lane.

(C) DNA sequence comparison of WT and mutant *Gr33a* alleles.

(D) Predicted amino acid sequence of WT and mutant *D. simulans* *Gr33a*. \*, premature stop codon.

(E, F) WT and *Gr33a* mutant *D. simulans* males court conspecifics at high levels and show similar low (*D. yakuba*) to minimal (*D. melanogaster* and *D. virilis*) levels of courtship toward females of other species.

(G, H) WT and *Gr33a* mutant *D. simulans* males show similar low levels of courtship toward conspecific males.

Mean ± SEM; each circle denotes CI of one male; n = 10 - 24/genotype.

(I) We tested whether, similar to *D. melanogaster*, *Gr33a* inhibits feeding on quinine-containing food in *D. simulans*.

(J) Significant decrease in preference by *Gr33a* mutant *D. simulans* for food containing only sucrose.

Mean ± SEM; each circle denotes Preference Index for one experiment; 90 ± 4 *D. simulans* of each genotype were used/experiment; n = 6 - 10 experiments/genotype; \*\*\*p<0.001.



Figure S4, related to Figure 4

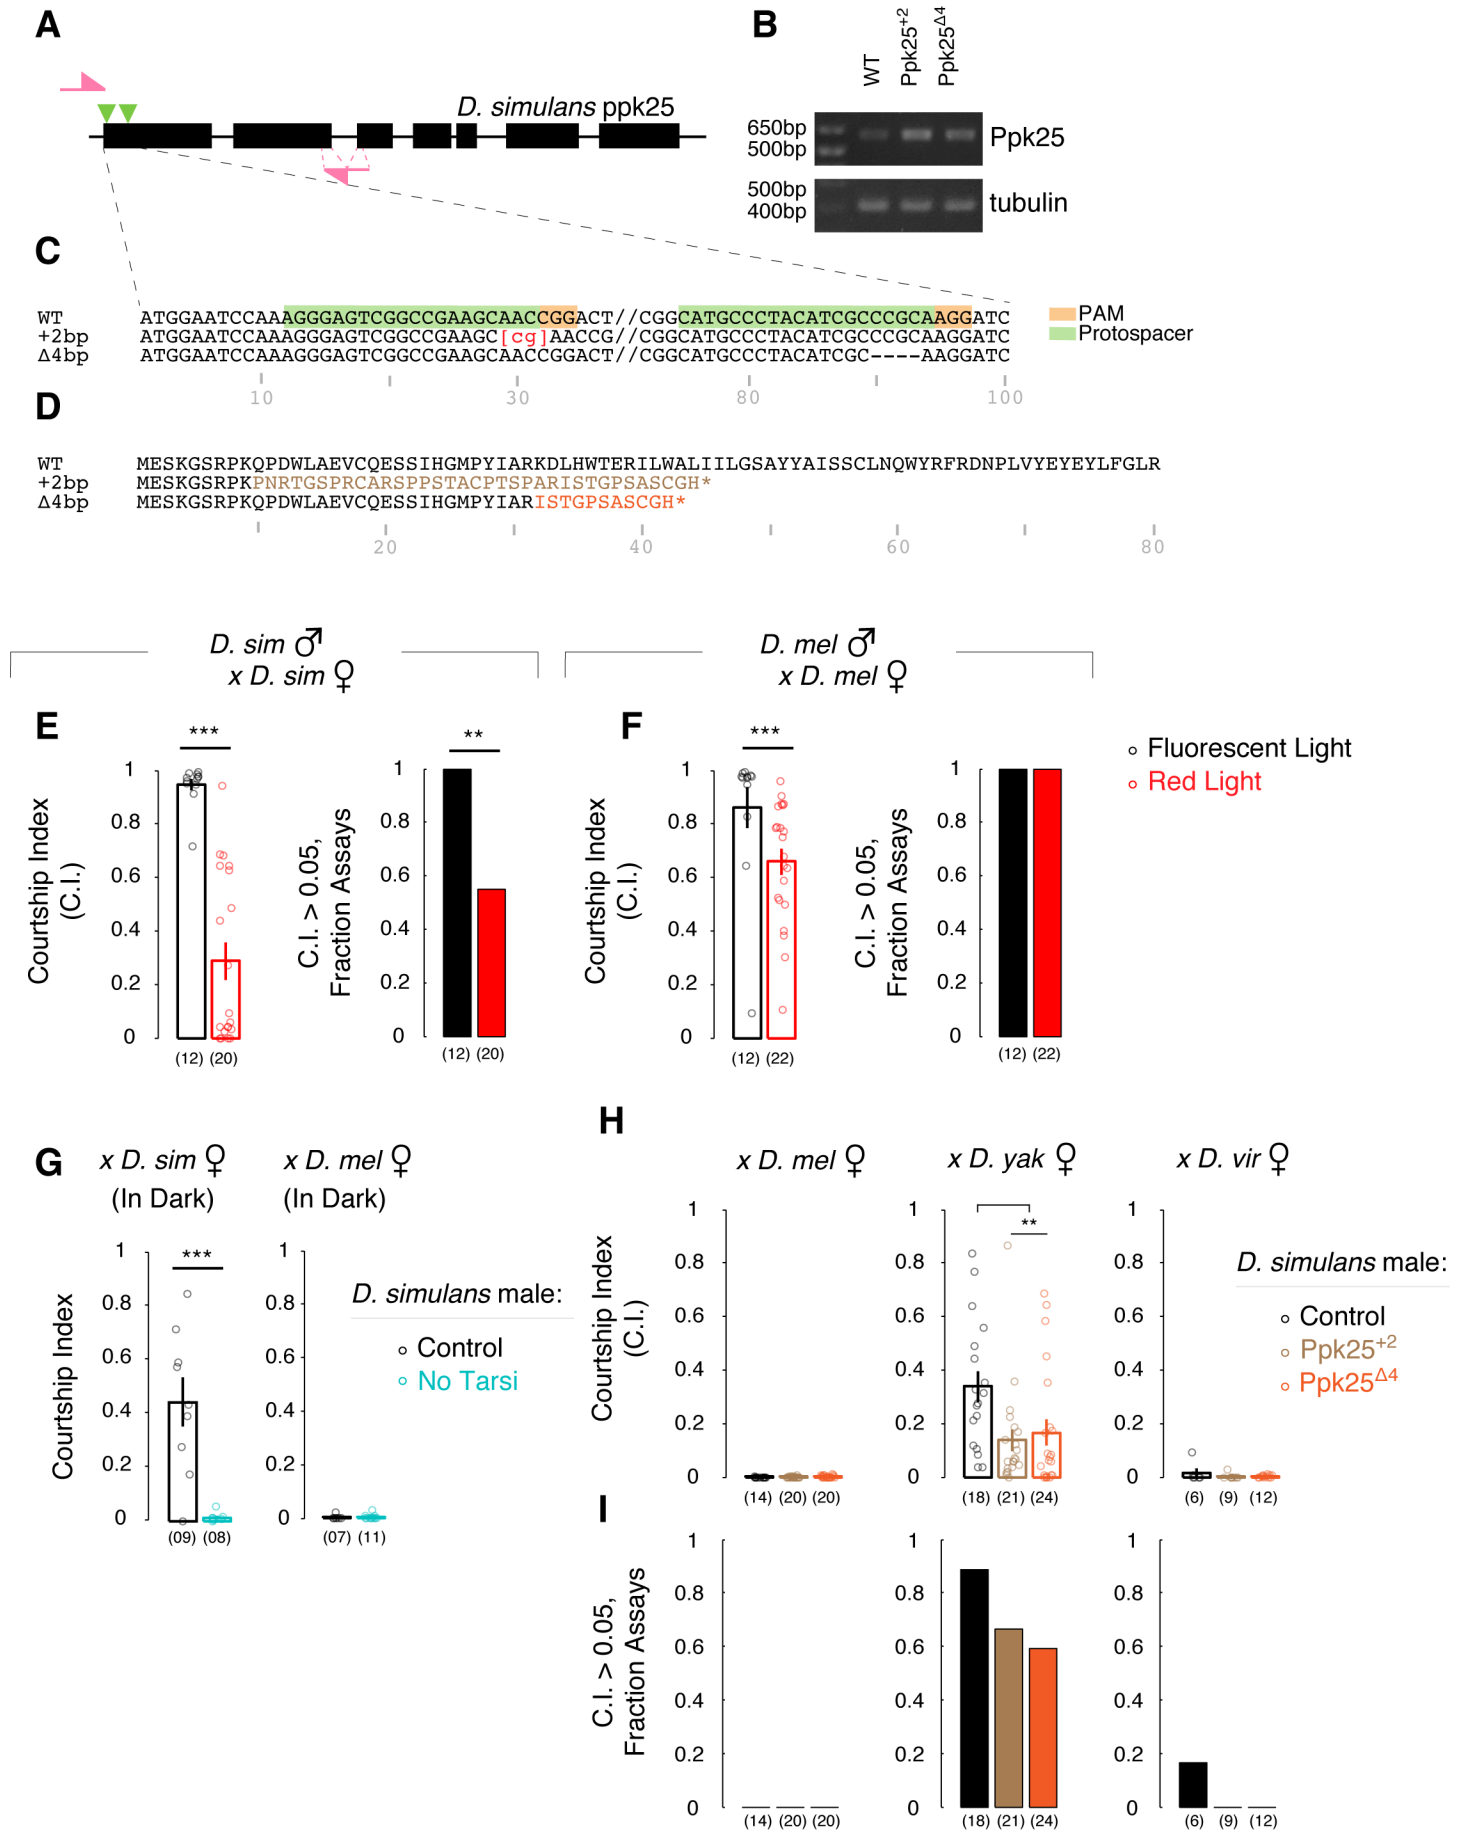

**Figure S4: Ppk25 is not essential to inhibit interspecies courtship by *D. simulans* males.**

**Related to Figure 4.**

(A) Schematic of *D. simulans* *Ppk25* locus. Pink arrows, PCR primers; green triangles, CRISPR target sites; black rectangles, exons.

(B) RT-PCR products for *Ppk25* and tubulin in WT and *Ppk25* mutant *D. simulans*, using PCR primers shown in (A). DNA ladder shown in first lane.

(C) DNA sequence comparison of WT and mutant *Ppk25* alleles.

(D) Predicted amino acid sequence of WT and mutant *D. simulans* *Ppk25*. \*, premature stop codon.

(E, F) *D. simulans* and *D. melanogaster* males court conspecific females less under red light-only illumination.

(G) *D. simulans* males require foreleg tarsi for courtship under dark conditions.

(H, I) No difference between *D. simulans* males WT or mutant for *Ppk25* in courtship of *D. melanogaster* and *D. virilis* females. Mutant males court *D. yakuba* females less than WT (G).

Mean  $\pm$  SEM; each circle denotes CI for one male; n = 6-24/cohort; \*\*p<0.01; \*\*\*p<0.001.

**Table S1. Related to Figures 2, S2, S3, and S4**

| Name              | Experiment                                                                                                   | 5' to 3' Sequence          |
|-------------------|--------------------------------------------------------------------------------------------------------------|----------------------------|
| sim32 fwd         | Amplifying ~3.8kb Gr32a regulatory region from <i>D. simulans</i> to generate Gr32a <sup>sim</sup> -GAL4     | GTCCCCTTGCGGTTGTTCT        |
| sim32 rev         |                                                                                                              | TTCAATTACCCAAGTGTTTCG      |
| mel32 fwd         | Amplifying ~3.8kb Gr32a regulatory region from <i>D. melanogaster</i> to generate Gr32a <sup>mel</sup> -GAL4 | AAGTGGTTGGTCTTGGAT         |
| mel32 rev         |                                                                                                              | TTCAATTACCCAAGTGTTTCG      |
| CrisprGr32a A fwd | CRISPR oligos targeting <i>D. simulans</i> Gr32a                                                             | CTTCGGAAGGCATCCCGGGTTAACA  |
| CrisprGr32a A rev |                                                                                                              | AAACTGTTAACCCGGGATGCCTTCC  |
| CrisprGr32a B fwd |                                                                                                              | CTTCGTCGGAGACCTGTTTCGTATAT |
| CrisprGr32a B rev |                                                                                                              | AAACATATACGAACAGGTCTCCGAC  |
| CrisprGr32a C fwd |                                                                                                              | CTTCGTTTTACTCGTTCTTCGTAAG  |
| CrisprGr32a C rev |                                                                                                              | AAACCTTACGAAGAACGAGTAAAAC  |
| CrisprGr33a A fwd | CRISPR oligos targeting <i>D. simulans</i> Gr33a                                                             | CTTCGTCCACTGAATCGCCAGCAAT  |
| CrisprGr33a A rev |                                                                                                              | AAACATTGCTGGCGATTCAAGTGGAC |
| CrisprGr33a B fwd |                                                                                                              | CTTCGATAAATCTTACCCACATTAT  |
| CrisprGr33a B rev |                                                                                                              | AAACATAATGTGGGTAAGATTTATC  |
| CrisprGr33a C fwd |                                                                                                              | CTTCGGCTGAGTCTTTATCGCCGAA  |
| CrisprGr33a C rev |                                                                                                              | AAACTTCGGCGATAAAGACTCAGCC  |
| CrisprPpk25 A fwd | CRISPR oligos targeting <i>D. simulans</i> Ppk25                                                             | CTTCGAGGGAGTCGGCCGAAGCAAC  |
| CrisprPpk25 A rev |                                                                                                              | AAACGTTGCTTCGGCCGACTCCCTC  |
| CrisprPpk25 B fwd |                                                                                                              | CTTCGCATGCCCTACATCGCCCGCA  |
| CrisprPpk25 B rev |                                                                                                              | AAACTGCGGGCGATGTAGGGCATGC  |
| Gr32a RTPCR fwd   | primers for RT-PCR of <i>D. simulans</i> Gr32a                                                               | TAATCCACAATGCCAAGCAA       |
| Gr32a RTPCR rev   |                                                                                                              | AGGAACTTATCGATGATATTCTGAT  |
| Gr33a RTPCR fwd   | primers for RT-PCR of <i>D. simulans</i> Gr33a                                                               | CGGAGTAGCGAGTAAATTCCA      |
| Gr33a RTPCR rev   |                                                                                                              | TCGGATGTGTTTCCGGTATT       |
| Ppk25 RTPCR fwd   | primers for RT-PCR of <i>D. simulans</i> Ppk25                                                               | ACATCATGGAATCCAAAGG        |
| Ppk25 RTPCR rev   |                                                                                                              | ATCCAGTGTTTCTAGTTTGCC      |

|                      |                                                     |                      |
|----------------------|-----------------------------------------------------|----------------------|
| tubulin RTPCR<br>fwd | primers for RT-PCR of <i>D. simulans</i><br>tubulin | CTTGTCGCGTGTGAAACACT |
| tubulin RTPCR<br>rev |                                                     | GGATCCTGTCCAGAACCAGA |

**Table S1: List of oligos and primers used in this study. Related to Figures 2, S2, S3, and S4.**

**Table S2. Related to STAR Methods and Figure S2**

| Predicted TM domains | Gr32a Amino Acid Range |                    |
|----------------------|------------------------|--------------------|
|                      | <i>D. melanogaster</i> | <i>D. simulans</i> |
| TM1                  | 101-119                | 101-120            |
| TM2                  | 134-156                | 131-149            |
| TM3                  | 187-206                | 187-206            |
| TM4                  | 215-239                | 215-239            |
| TM5                  | 310-329                | 310-327            |
| TM6                  | 356-378                | 354-378            |
| TM7                  | 419-443                | 419-443            |
|                      |                        |                    |
| TM, transmembrane    |                        |                    |
|                      |                        |                    |

**Table S2: Predicted transmembrane domains of Gr32a. Related to STAR Methods and Figure S2.**

**Table S3. Related to STAR Methods and Figures S2, S3, and S4.**

| <b>Locus</b> | <b># CRISPR Guides Injected</b> | <b># injected embryos</b> | <b># larvae</b> | <b># G0 flies</b> | <b># G0 flies that yielded progeny (F1)</b> | <b># G0 flies that yielded mutant F1 flies</b> | <b># F1 flies bearing distinct indel mutations</b> | <b>Homozygous Stocks used in study</b> |
|--------------|---------------------------------|---------------------------|-----------------|-------------------|---------------------------------------------|------------------------------------------------|----------------------------------------------------|----------------------------------------|
| Gr32a        | 3                               | 300                       | 40              | 15                | 7                                           | 3                                              | 7                                                  | 3                                      |
|              | 2                               | 300                       | 15              | 10                | 5                                           | 1                                              | 3                                                  | 0                                      |
|              |                                 |                           |                 |                   |                                             |                                                |                                                    |                                        |
| Gr33a        | 3                               | 519                       | 298             | 78                | 26                                          | 3                                              | 7                                                  | 2                                      |
|              |                                 |                           |                 |                   |                                             |                                                |                                                    |                                        |
| Ppk25        | 2                               | 510                       | 185             | 86                | 44                                          | 2                                              | 4                                                  | 2                                      |

**Table S3: *D. simulans* pDCC6 CRISPR injection counts. Related to STAR Methods and Figures S2, S3, and S4.**
